# Supplementary material for: Varicella-zoster virus susceptibility and primary healthcare consultations in Norway
Source: BMC Infect Dis. 2016 Jun 7;16:254. doi: 10.1186/s12879-016-1581-4 (PMC4897873; doi:10.1186/s12879-016-1581-4)
Supplement: Additional file 2: — Model fitting information (Likelihood ratios and 95 % confidence intervals (CI)). (S: Sex; R: region; A: age groups. Df: the number of parameters that differ between the two nested models; AIC: Akaike information criterion). (XLSX 10 kb) [file 12879_2016_1581_MOESM2_ESM.xlsx]

## Sheet: Ark1
Additional file 2. Model fitting information to the table 2 (Likelihood ratios and 95% confidence intervals (CI)). (S: Sex; R: region; A: age groups. Df: the number of parameters that differ between the two nested models; AIC: Akaike information criterion)
			Likelihood ratio test
Model comparison	AIC unrestricted model	AIC restricted model	Chi sq	Df	p-value
Model S R vs. Model S	2182	2205	35	6	3.6 e-06
Model S A vs. Model S	1487	2205	757	20	< 2.2e-16
Model S A R vs. Model S A	1489	1487	9.97	6	0.12
Model S A R vs. Model S R	1489	2182	7.78	8	< 2.2e-16
